# Supplementary material for: Using NDII patterns to constrain semi-distributed rainfall-runoff models in tropical nested catchments
Source: Copernicus journal article supplement (doi:10.5194/hess-2021-598), 2021-12-20
Supplement: Supplementary file [file hess-2021-598-AC2-supplement.pdf]

## Reply to anonymous Referee #2

### Referee #2' s comment:

The present manuscript describes an effort to incorporate the Normalized Difference Infrared Index (NDII) into a semi-distributed hydrological model based on the FLEXL model structure (including distributed time lags and channel routing routines), to drive partitioning of the water balance in favor of more realistic soil moisture storage capacities in the Upper Ping River basin in Thailand.

The effort to test remote sensing products readily available to the hydrological modelling community is scientifically relevant, and the proposals to obtain maximum moisture storage capacities from annual NDII values seem interesting and relatively novel to me. However, a broader bibliographic context on the work being done by other research groups worldwide seems to be missing from this article.

### *Answer:*

*We thank you very much for your very careful review of our manuscript. We will utilize your comments and suggestions to improve the manuscript. Firstly, we will further look for research papers carried out by other groups related to our work. We would like to answer your other concerns and comments as follows.*

### Referee #2' s comment:

It is my opinion that some of the conclusions presented in the paper are not supported by the modelling exercise, and some others are not substantial. After carefully reviewing the methodological strategy and the results, it seems to me that a part of the validation process is not rigorous enough from the point of view of causality. For example, when trying to validate with average NDII values the soil moisture contents that were simulated/constrained with the average and range of the very same NDII, as we would want to use independent (and ideally direct) observations to achieve rigorous validation. Following this precept, the use of the Soil Wetness Index (SWI) for validation purposes is more appropriate, although it is partly model-based and does not constitute either a direct observation or an indirect one that was empirically validated on direct measurements in the study area. Furthermore, the good correlation between the SWI and all models (whether NDII-based or not), both during the dry and wet seasons, leaves the impression that the contribution of the NDII is not fundamentally relevant to simulate the soil moisture component. It would be worth asking if the modelling could be made more efficient by constraining the soil moisture holding capacity routine rather with the SWI, which seems not to be particularly affected by the wet season effect, which was known in advance to be a limiting factor for the NDII.

### *Answer:*

*We agree that it is not appropriate to validate the performance of the NDII-constrained models on the correspondence between computed  $S_u$  and NDII. That is why we used the SWI as well. We will revise our manuscript by using only SWI for validation purpose. However, we do not think that SWI is a good constraint for distributed modelling, because it is partly model-based. It would lead*

*to circular reasoning. NDII, however, is an independent observation. Therefore, using NDII as a constraint and using SWI as a validity check is a better approach.*

*In the final paper we shall do a formal split-series calibration-validation test and uncertainty analysis (requested by referee#1) of the different models which shows the added value of using the NDII. That SWI works better during wet periods is not a real advantage. The soil moisture holding capacity is far stronger constrained by the stress periods, which is during the dry season. In the final check against the SWI we demonstrate that our approach also results in realistic values during wet periods and in wet ecosystems, such as evergreen forest.*

**Referee #2' s comment:**

Although in general the article seems well written to me, the wording of section 4.2 could be improved in order to avoid ambiguities (lines from 10 to 15 are not very straightforward). Tables 4 and 5 could also be improved, as they present duplicate data in some cases, and tabulations that do not seem appropriate. For example, by presenting results of the lumped FLEXL model calibrated for each of the various sub-catchments studied but tabulating these data under the table section: "for calibration at station P.1". Evidently a lumped model that was calibrated at P.1 could not provide results for individual upstream sub-catchments.

**Answer:**

*We will rewrite section 4.2 to avoid ambiguities as suggested by the referee. We will note in Tables 4 and 5 that FLEXL was calibrated at all gauging stations while all semi-distributed models were only calibrated at P.1.*

**Referee #2' s comments:**

I have trouble endorsing some interpretations and statements expressed in the results section. But I think the article is especially lacking in its conclusions, which I believe are not being formally supported and proven. For example, on p. 14, L. 16-17, it reads: "The results indicate that the relationship with the average root zone soil moisture storage is affected by the ecology of the river basin.". The term "ecology" is extremely broad and complex, and there is no definition and characterization of it in the article. Even less, a scientific demonstration of such soil moisture-ecology relationship. The article goes on to state that: "The results confirm the power of NDII to capture the spatial variation of root zone soil moisture within the sub-catchment scale", which, again, is neither accurate nor was it strictly proven through the scientific method.

**Answer:**

*We agree that the term ecology is out of place. The term land-use or land-cover (where appropriate) is more appropriate. We shall make this change in the re-submission. The sentence about the spatial variation should be reformulated as: "The results confirm the power of NDII to represent spatial variation of root zone soil moisture between sub-catchments" In this context it is good to observe that the average NDII value of each sub-catchment appears to be related with the percentages of evergreen forest of each sub-catchment.*

**Referee #2' s comment:**

On p. 15, L. 9-11, it reads: “As a result, the NDII appears to be useful to constrain hydrological models during dry conditions and both SWI and NDII appear to be useful to test model performance and to assess moisture states of river basins.”. As stated earlier in this review, if NDII were used as a soil moisture model forcing, would not the simulation be expected to show this correlation? Furthermore, how sensitive is the model to forcing if even having constrained the soil moisture routine with the NDII, the result reveals a poor correlation between them during the wet season?

**Answer:**

*We agree that NDII should not be used to test model performance. We shall remove this comparison and only retain the comparison between Su and SWI. We also agree that NDII is not an appropriate indicator for non-moisture-constrained situations. This is well-known and also explained in the paper. The NDII is primarily a constraint on the moisture stress situation, which is more powerful to constrain the root zone moisture stress function. The comparison between the modeled Su and the SWI indicates that the models that were constrained on the NDII during moisture stress periods are quite capable of representing the wet periods as well.*

**Referee #2' s comment:**

On p. 15, L. 18-19, it reads: “... it has been shown that it is required to account for the spatial variation of the moisture holding capacity of the root zone.”. In fact, this was not shown, considering that the best independent validation tool presented in the article is the SWI, which was shown to be highly correlated with the simulated soil moisture storage regardless of the inclusion of the NDII constrains in the model. In addition, including or not the spatial variation of the moisture holding capacity of the root zone is not necessarily required in all cases, but rather depends on the objectives of the modelling exercise. For example, if the objective is the best possible calibration of a rainfall-runoff model in the outlet of a basin for seasonal hydrological prediction purposes, as we have seen, in some cases a lumped model could generate greater efficiencies.

**Answer:**

*It is not surprising that a calibrated lumped model can generate more accurate runoff estimates at the outlet of the basin, but it requires model calibration at each station. This study proved that the developed semi-distributed rainfall-runoff models can provide as accurate runoff estimates at the calibrated station as well as at those stations upstream. This would make it possible to predict runoff at any require location within a river basin, without a gauging station being available. This is a great advantage for ungauged basins where flow and flood prediction is one of the main concerns of the hydrological community.*

**Referee #2' s comment:**

P. 15, L. 20-21: “We concluded that the maximum of a series of annual ranges (NDIIMaxMin) and annual average (NDIIAvg) of NDII values offers an effective proxy for estimating the appropriate Sumax values in the different sub-catchments. “. Again, it seems to me that the data presented cannot support this conclusion.

***Answer:***

*We will rewrite our conclusion properly in our revised manuscript.*

**Referee #2' s comment:**

P. 16, L. 1-2: "... However, during the wet season when soil moisture is replenished as a result of rainfall, NDII values are no longer well correlated with soil moisture." In multiple parts of this article reference is made to "soil moisture" in order to later infer and conclude facts (such as its possible relationship with the NDII during the wet season), without the precaution that this soil moisture is not actually observed, but only a modeled value that was partially validated based on an indirect index (SWI). Due to the above, it does not seem appropriate to refer to soil moisture without specifying each time that it is a simulated value, nor drawing conclusions based on said simulated values, considering that they have not been sufficiently validated in the field and, therefore, cannot offer acceptable levels of accuracy and precision.

***Answer:***

*We will revise our manuscript accordingly.*

**Referee #2' s comment:**

In conclusion, I believe that this article could be substantially improved by better contextualizing it within the current global research environment on the specific topic of using remote sensing to improve soil moisture simulation in distributed hydrological models (how many other research initiatives around the world are trying to use the NDII to better simulate soil moisture storage capacity?). I would also suggest better organization, simplification and clarification of the description of the methodology (particularly section 4.2), and a thorough review of the modelling strategy, to avoid later interpretations that are irrelevant or based on spurious relationships (such as correlating an explicitly introduced forcing of the model outputs with those model outputs) or reaching conclusions that were not subject to hypothesis and testing (such as concluding about the ecology of a basin without having first systematized and analyzed that concept, or establishing the need to adopt a specific approach such as distributed modelling without sufficient empirical evidence to support it).

***Answer:***

*Thank you so much for all valuable comments and suggestions provided. We shall remove the comparison between Su and NDII and maintain the comparison with the SWI. We shall also include a formal calibration-validation on sub-basin runoff to demonstrate that the NDII-based method improved internal model performance.*
